# Supplementary material for: The size of the primary tumor and age at initial diagnosis are independent predictors of the metastatic behavior and survival of patients with SDHB-related pheochromocytoma and paraganglioma: a retrospective cohort study
Source: PubMed Central journal article supplement (PMC4223758; doi:10.1186/1471-2407-14-523), 2014-07-21

ROC: Survival or Metastases by Size

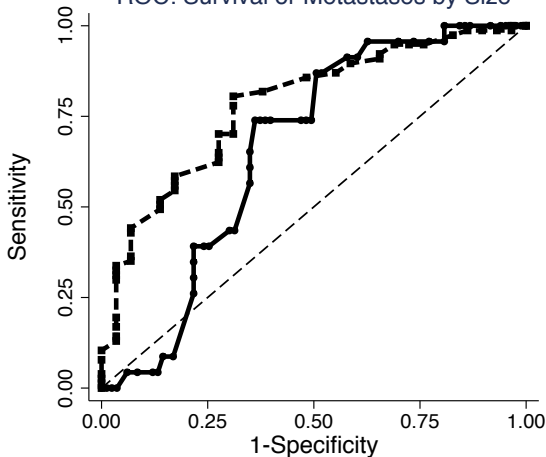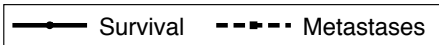

Supplement: 1471-2407-14-523-S1.pdf [file 1471-2407-14-523-S1.pdf]
